# Supplementary material for: Towards practical, high-capacity, low-maintenance information storage in synthesized DNA
Source: Springer Nature journal article supplement (doi:10.1038/nature11875), 2013-01-22
Supplement: 41586_2013_BFnature11875_MOESM338_ESM.pdf [file 41586_2013_BFnature11875_MOESM338_ESM.pdf]

# FastQC Report

aln.bam

## Summary

- Basic Statistics
- Per base sequence quality
- Per sequence quality scores
- Per base sequence content
- Per base GC content
- Per sequence GC content
- Per base N content
- Sequence Length Distribution
- Sequence Duplication Levels
- Overrepresented sequences
- Kmer Content

## Basic Statistics

| Measure            | Value                   |
|--------------------|-------------------------|
| Filename           | aln.bam                 |
| File type          | Conventional base calls |
| Encoding           | Sanger / Illumina 1.9   |
| Total Sequences    | 34252010                |
| Filtered Sequences | 0                       |
| Sequence Length    | 104                     |
| %GC                | 49                      |

## Per base sequence quality

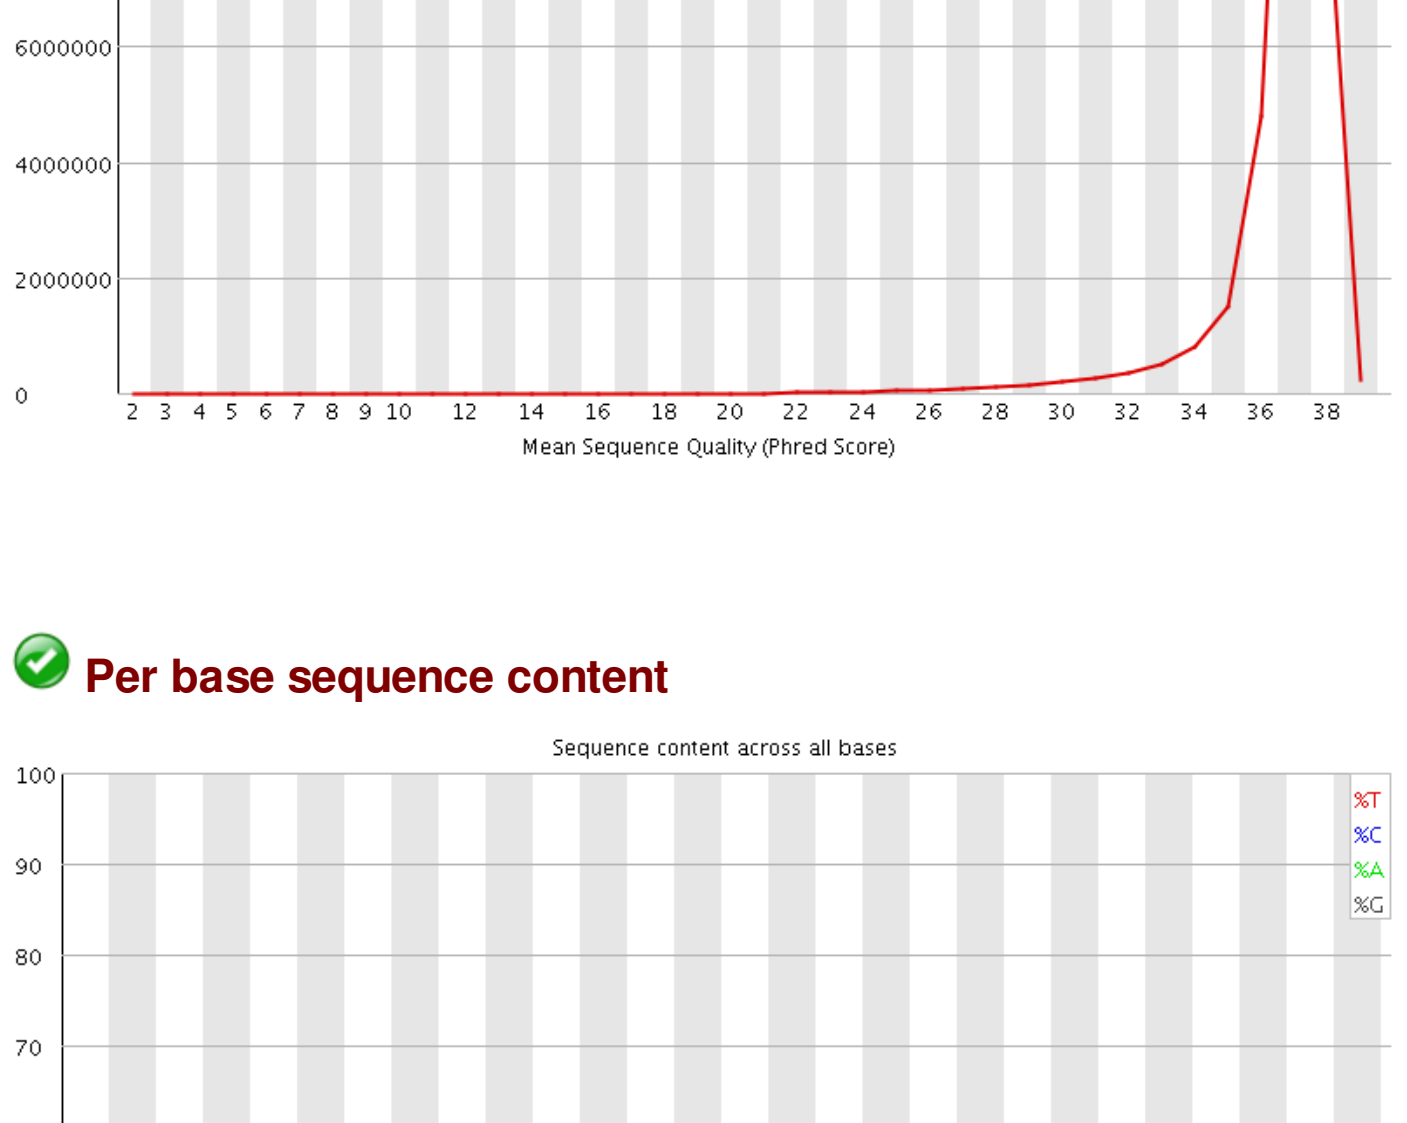

## Per sequence quality scores

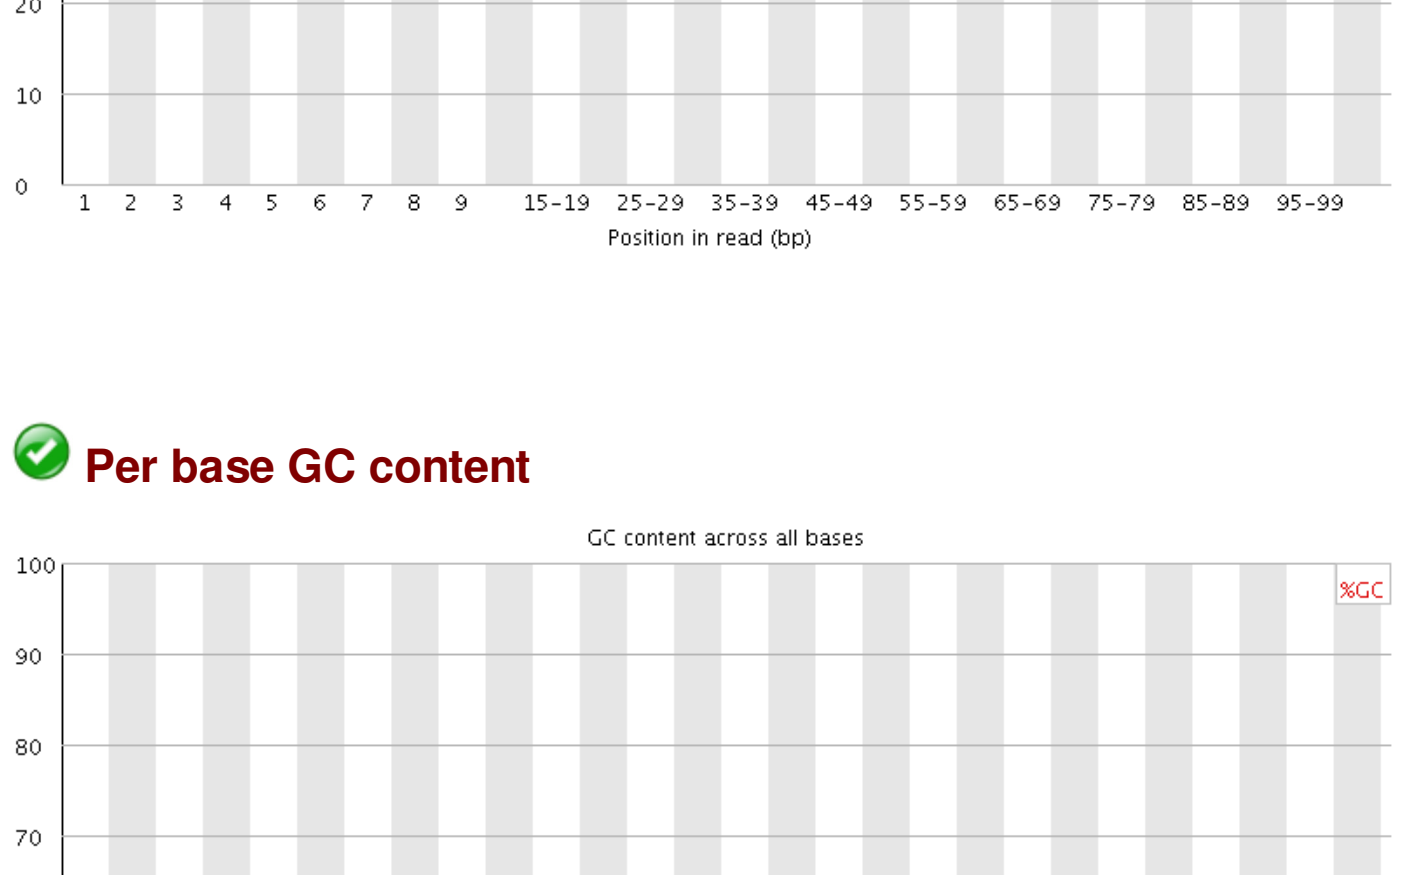

## Per base sequence content

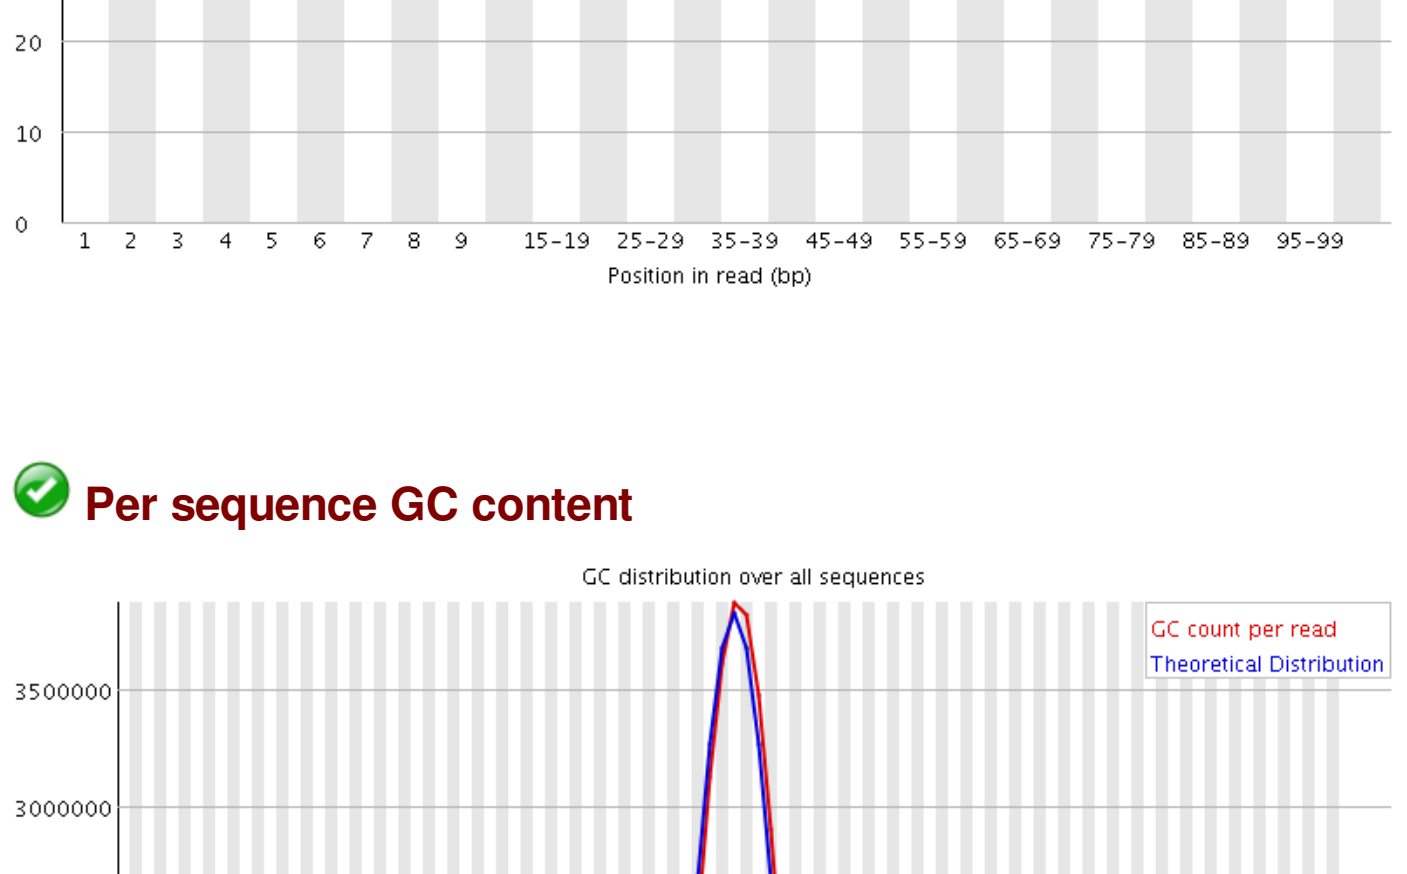

## Per base GC content

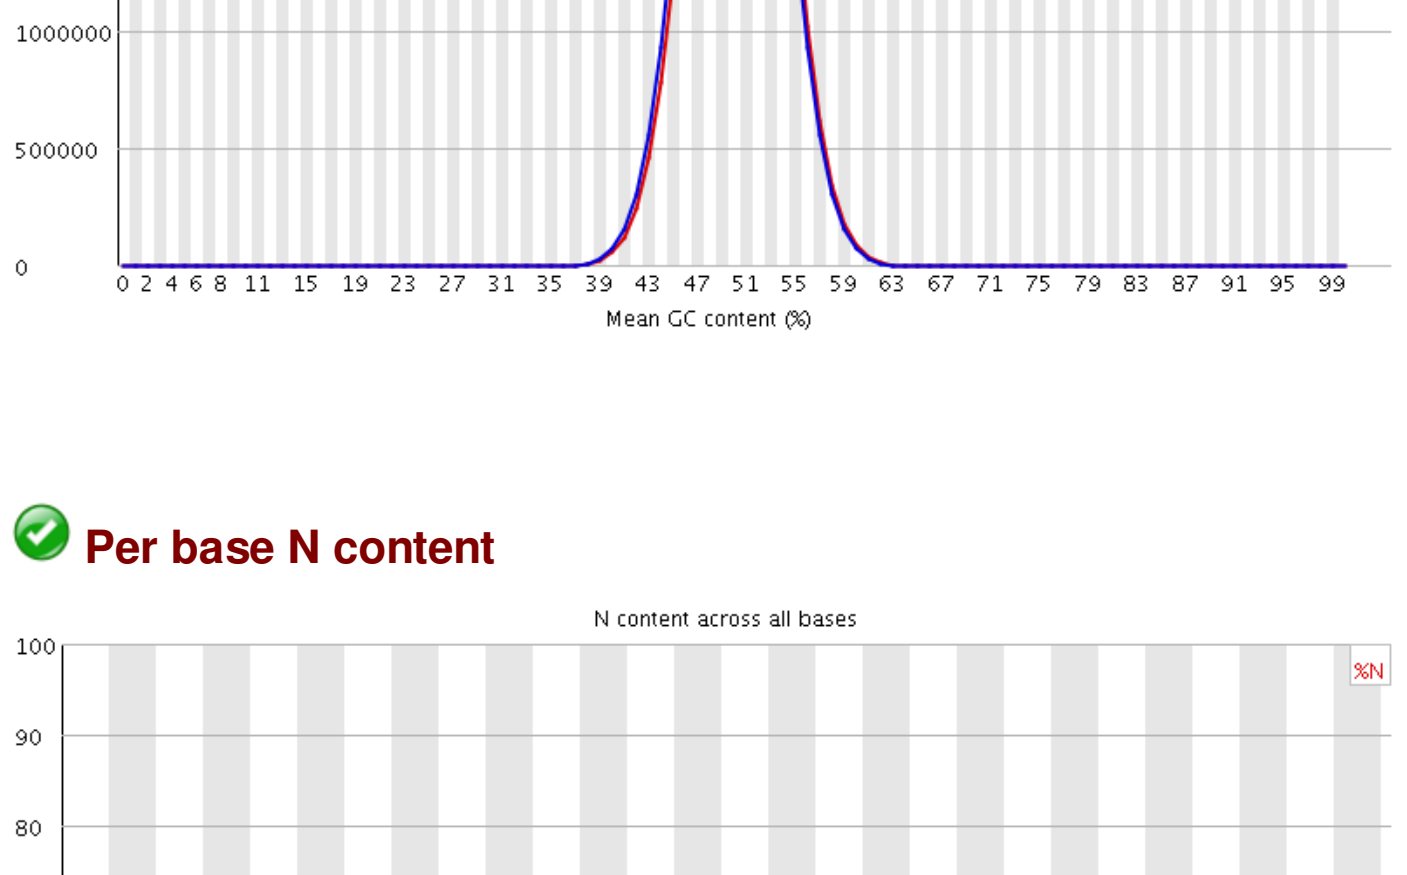

## Per sequence GC content

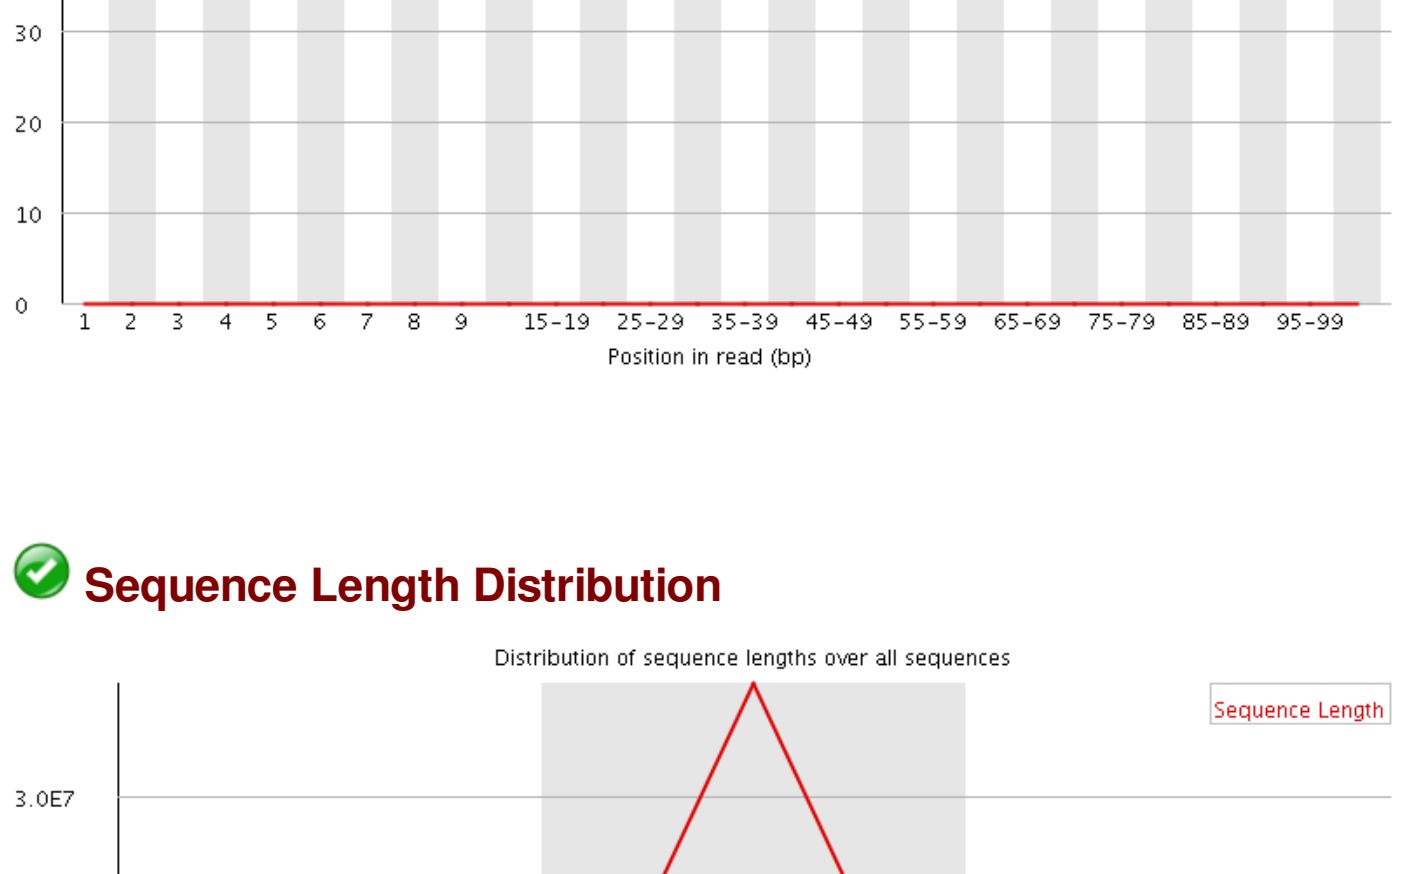

## Per base N content

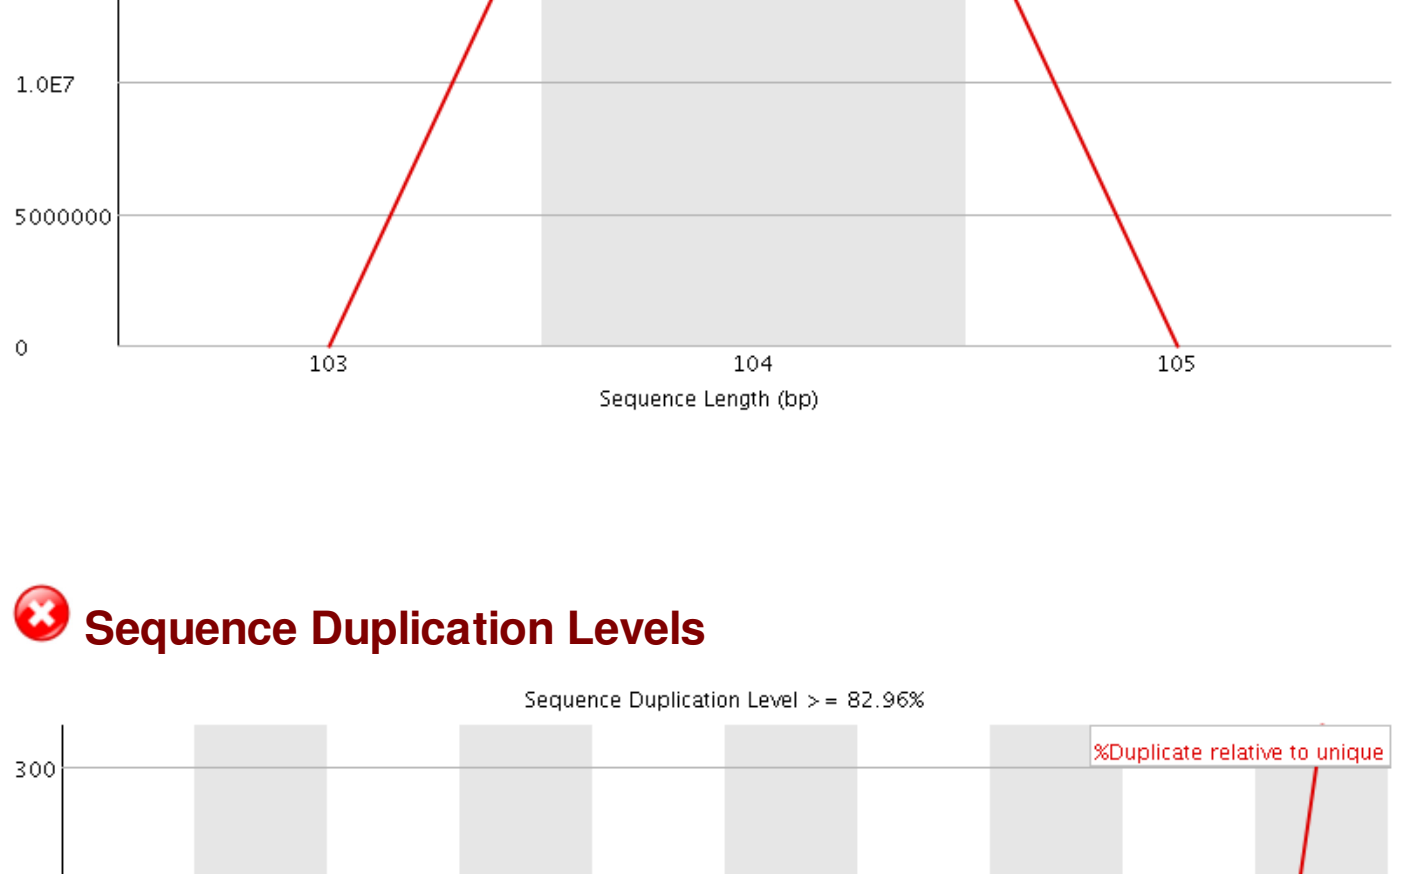

## Sequence Length Distribution

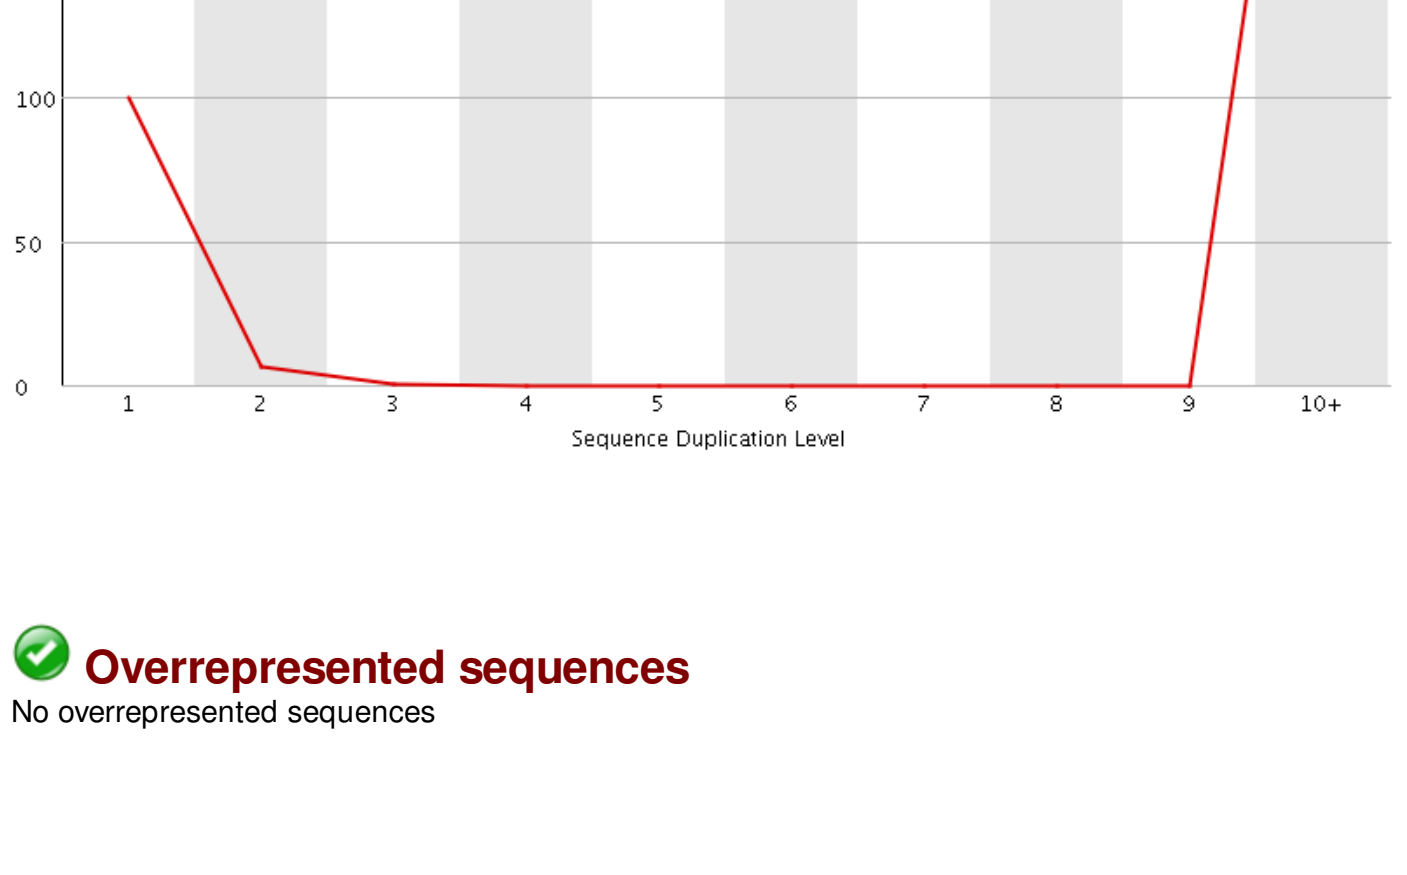

## Sequence Duplication Levels

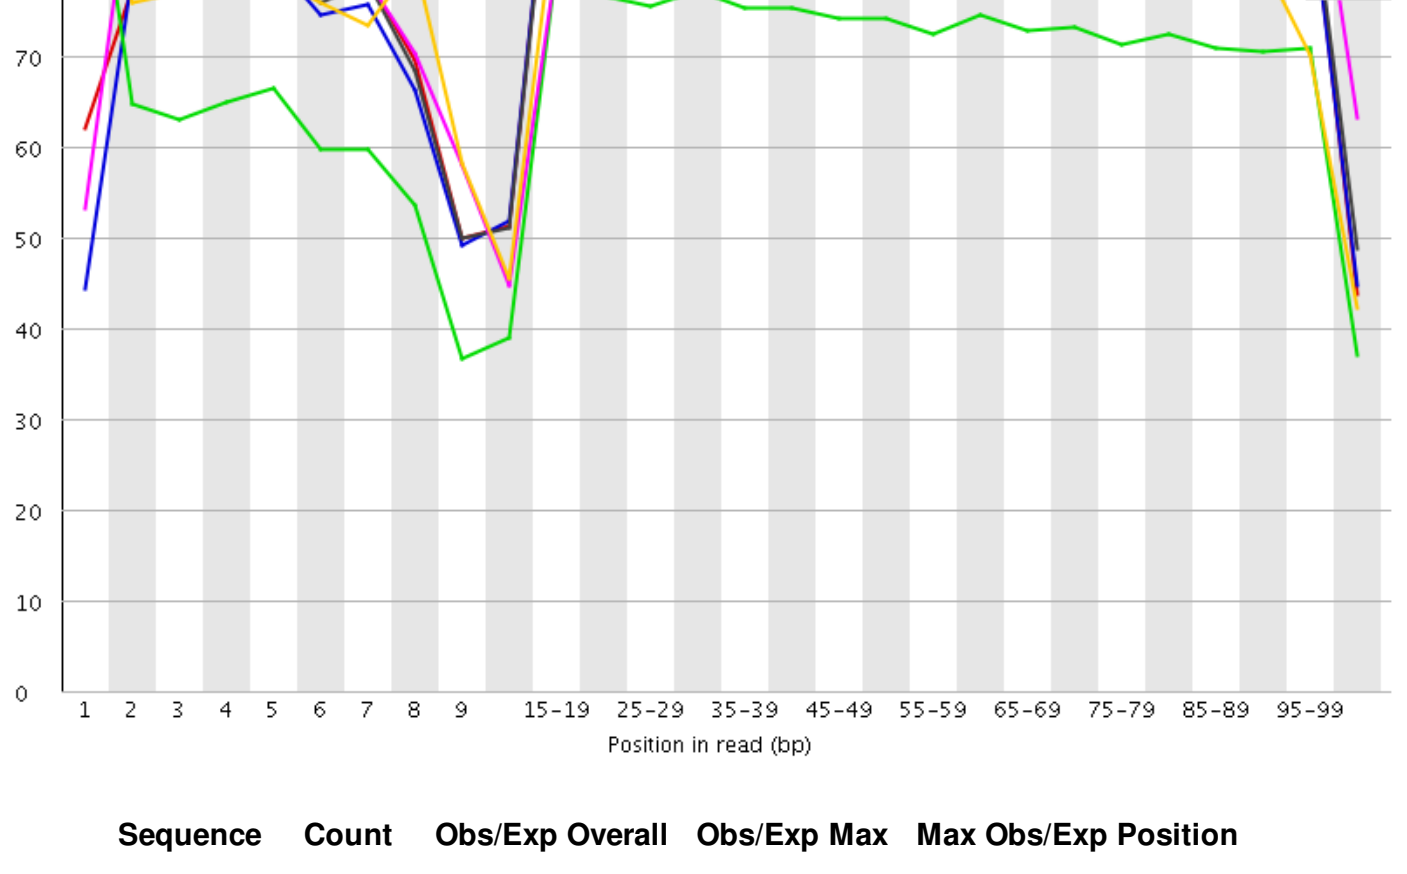

## Overrepresented sequences

No overrepresented sequences

## Kmer Content

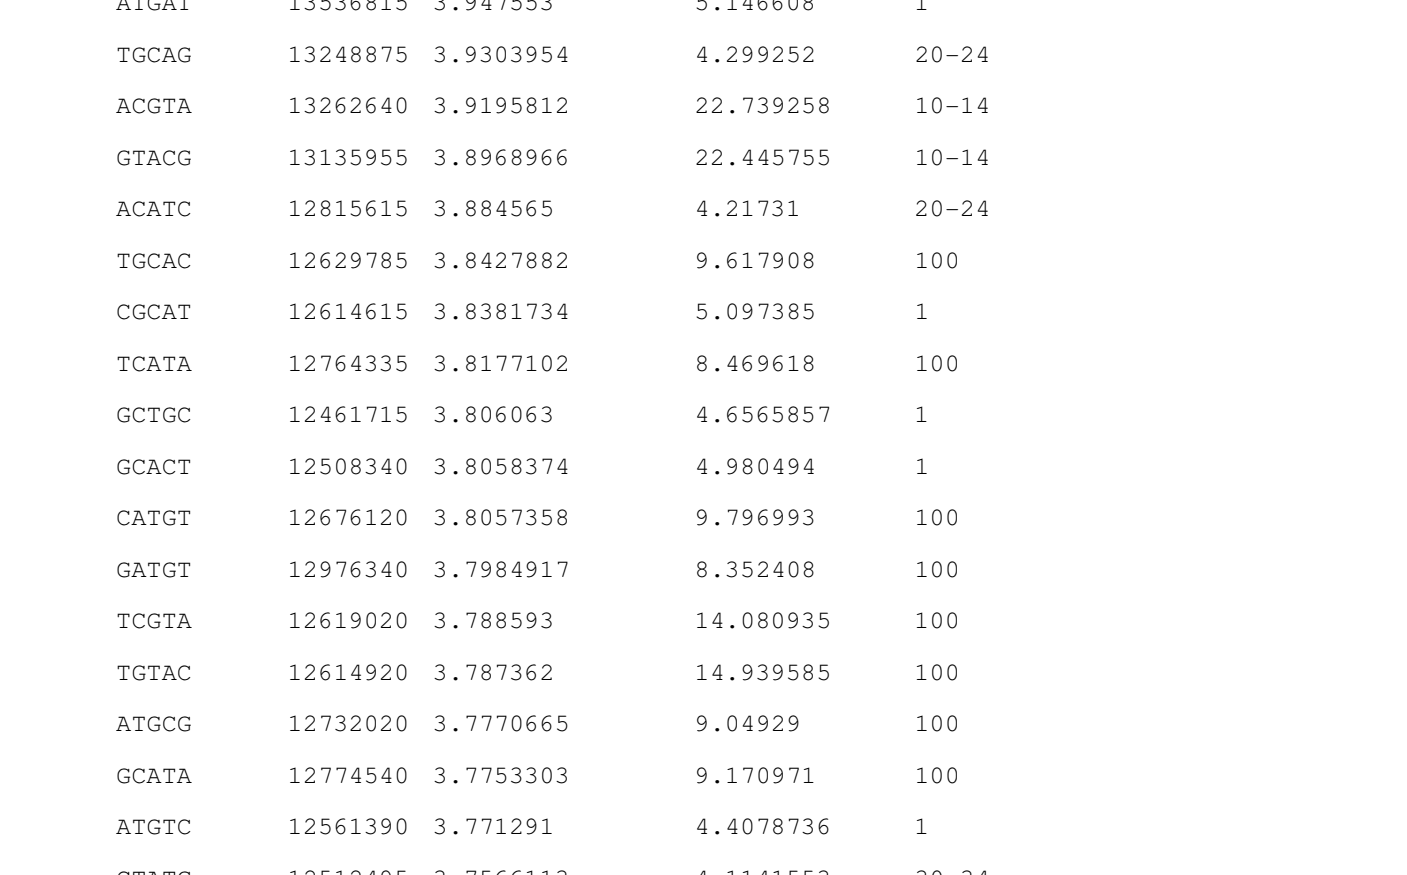

| Sequence | Count    | Obs/Exp Overall | Obs/Exp Max | Max Obs/Exp Position |
|----------|----------|-----------------|-------------|----------------------|
| TGCAT    | 15613835 | 4.6877217       | 5.302181    | 15-19                |
| TGATG    | 15311720 | 4.658805        | 5.320044    | 15-19                |
| ATGCA    | 15723265 | 4.6467834       | 6.540238    | 1                    |
| GCATG    | 15440775 | 4.5806417       | 5.189008    | 1                    |
| CAGCA    | 14257910 | 4.2703533       | 4.727092    | 90-94                |
| GCATC    | 13702400 | 4.1691477       | 5.110117    | 1                    |
| CATCA    | 13672775 | 4.1443806       | 4.6072593   | 15-19                |
| ATCAT    | 13836880 | 4.1384997       | 5.18818     | 1                    |
| TGACT    | 13479140 | 4.046826        | 5.664456    | 1                    |
| GATGC    | 13793910 | 4.026819        | 4.4314094   | 40-44                |
| TCATG    | 13404445 | 4.0244          | 4.42579     | 20-24                |
| TGATG    | 13700495 | 4.0104694       | 4.3855915   | 25-29                |
| TGCTG    | 13727820 | 4.000028        | 4.636728    | 3                    |
| CGTAC    | 13143400 | 3.9990633       | 22.822432   | 10-14                |
| CTGCA    | 13125045 | 3.9934785       | 4.3507915   | 2                    |
| TACGT    | 13276360 | 3.9859455       | 22.784657   | 10-14                |
| CATGA    | 13460905 | 3.9778227       | 4.3421555   | 20-24                |
| AGCAT    | 13369655 | 3.9501173       | 4.321       | 20-24                |
| TATGC    | 13149175 | 3.947761        | 7.9518943   | 1                    |
| ATGAT    | 13536815 | 3.947553        | 5.146608    | 1                    |
| TGCAG    | 13284875 | 3.9303954       | 4.299252    | 20-24                |
| ACGTA    | 13262640 | 3.9195812       | 22.739258   | 10-14                |
| CTACG    | 13135955 | 3.8968966       | 22.445755   | 10-14                |
| ACATC    | 12815615 | 3.884565        | 4.21731     | 20-24                |
| TGCAC    | 12629785 | 3.8427882       | 9.617908    | 100                  |
| CCGAT    | 12614615 | 3.8381734       | 5.097385    | 1                    |
| TCATA    | 12764335 | 3.8171102       | 8.469618    | 100                  |
| GCTGC    | 12461715 | 3.806063        | 4.6565857   | 1                    |
| GCATC    | 12587095 | 3.8058374       | 4.980494    | 1                    |
| CGACT    | 12767120 | 3.8053758       | 9.756993    | 100                  |
| GATGT    | 12976340 | 3.7984917       | 8.352408    | 100                  |
| TGCTA    | 12619020 | 3.788593        | 14.080935   | 100                  |
| TGTAC    | 12614920 | 3.787362        | 14.939585   | 100                  |
| ATCGG    | 12732020 | 3.7770665       | 9.04929     | 100                  |
| GCATA    | 12774540 | 3.7753303       | 5.170971    | 100                  |
| ATGTC    | 12561390 | 3.771291        | 4.4078736   | 1                    |
| CTGAT    | 12512495 | 3.7566113       | 4.1141553   | 30-34                |
| CGTAT    | 12511235 | 3.7562327       | 8.410614    | 10-14                |
| CATAG    | 12696115 | 3.752153        | 4.0669823   | 15-19                |
| GCAGC    | 12477755 | 3.7513878       | 5.4139557   | 1                    |
| TCGCA    | 12317435 | 3.747752        | 4.119753    | 20-24                |
| GTGCA    | 12591285 | 3.7353156       | 4.0515785   | 10-14                |
| AGCAT    | 12439300 | 3.7256656       | 8.147622    | 100                  |
| TGCTT    | 12360020 | 3.724938        | 4.00732     | 20-24                |
| ACATG    | 12587520 | 3.7200592       | 4.148565    | 10-14                |
| TATGA    | 12571780 | 3.718624        | 5.136888    | 1                    |
| CACGT    | 12154680 | 3.6982315       | 13.9250345  | 100                  |
| ATACG    | 12494835 | 3.6926675       | 13.934726   | 100                  |
| TGCGA    | 12411655 | 3.6820266       | 3.9893134   | 20-24                |
| GACAT    | 12434795 | 3.6749234       | 3.9688184   | 30-34                |
| AGTGC    | 12362870 | 3.667554        | 4.010015    | 20-24                |
| GGTGA    | 12113485 | 3.593572        | 13.746721   | 100                  |
| AGTAC    | 12142295 | 3.5884793       | 12.926159   | 100                  |
| CTCGC    | 11748515 | 3.5882368       | 8.163661    | 100                  |
| CTAGT    | 10977820 | 3.2958754       | 13.980734   | 100                  |
| CGCAT    | 11832810 | 3.5574877       | 5.011808    | 1                    |
| GACGT    | 11882580 | 3.5250719       | 12.878546   | 100                  |
| AGATC    | 11909155 | 3.5195785       | 4.4370155   | 90-94                |
| GTACT    | 11691430 | 3.5101032       | 11.329644   | 10-14                |
| GTACA    | 11825435 | 3.494836        | 8.955261    | 10-14                |
| GATCG    | 11775010 | 3.4931602       | 4.0574284   | 80-84                |
| GTGTA    | 11903555 | 3.4844613       | 4.6585845   | 95-99                |
| ACGTC    | 11447990 | 3.483211        | 10.903815   | 10-14                |
| CACAT    | 11473025 | 3.4776106       | 3.820255    | 25-29                |
| TGATG    | 11753790 | 3.4736626       | 11.038851   | 10-14                |
| CGTAG    | 11614140 | 3.4454367       | 11.374617   | 10-14                |
| TACGC    | 11230820 | 3.4171343       | 8.379055    | 10-14                |
| CATCG    | 11198550 | 3.4073155       | 4.4967794   | 9                    |
| ATGAT    | 11614525 | 3.3998559       | 4.9317365   | 1                    |
| GCACA    | 11330970 | 3.3937123       | 5.555137    | 1                    |
| GTCGT    | 11255075 | 3.3931906       | 7.5912647   | 10-14                |
| TGTGC    | 11244600 | 3.3887842       | 3.680834    | 4                    |
| ACGTG    | 11359570 | 3.3688483       | 8.293049    | 10-14                |
| CATAT    | 11148430 | 3.3344057       | 3.7747946   | 15-19                |
| TCTGC    | 10748185 | 3.3222194       | 4.28572     | 1                    |
| GTATG    | 11370120 | 3.3197644       | 6.94853     | 10-14                |
| CGATG    | 11170105 | 3.31371         | 4.941036    | 1                    |
| CGTCG    | 10840620 | 3.310947        | 7.317803    | 100                  |
| AGAGC    | 11337275 | 3.3107266       | 3.9533596   | 90-94                |
| TGCTA    | 10977820 | 3.2958754       | 4.2452016   | 9                    |
| CATCT    | 10693990 | 3.2929516       | 3.7143486   | 1                    |
| ATGAC    | 11099075 | 3.2801712       | 4.512232    | 1                    |
| ACTGC    | 10780580 | 3.2801423       | 3.719684    | 2                    |
| ATCAT    | 11238985 | 3.2774687       | 5.1587157   | 1                    |
| CTCAT    | 10641610 | 3.2768226       | 3.8514223   | 15-19                |
| TACAT    | 10930020 | 3.2690814       | 7.3578057   | 10-14                |
| TGCTT    | 10873355 | 3.2642637       | 3.5315301   | 30-34                |
| TGCTC    | 10549555 | 3.2608235       | 3.593662    | 3                    |
| ATCGC    | 10709460 | 3.2585032       | 4.623581    | 1                    |
| GCAGT    | 10967095 | 3.2534852       | 5.193957    | 1                    |
| GAGCG    | 11066425 | 3.2439158       | 3.8778791   | 9                    |
| AGCGT    | 10923165 | 3.240453        | 4.0701733   | 10-14                |
| TCTCG    | 10476360 | 3.2381992       | 10.755919   | 100                  |
| TAGCA    | 10944745 | 3.2345612       | 5.4892764   | 1                    |
| GCTAT    | 10664925 | 3.2242317       | 4.6924706   | 1                    |
| CACGT    | 10582575 | 3.2198968       | 3.644505    | 2                    |
| TCACA    | 10580750 | 3.207151        | 3.5503004   | 5                    |
| GCAGA    | 10979530 | 3.2062573       | 5.1051173   | 1                    |
| CTAGT    | 10664500 | 3.2017896       | 5.763679    | 100                  |
| CATAC    | 10556045 | 3.1996627       | 4.5309644   | 100                  |
| TGTCA    | 10638095 | 3.1982624       | 3.583972    | 6                    |
| CGTGT    | 10590335 | 3.1931604       | 4.8921156   | 1                    |
| TGCGC    | 10483225 | 3.1896677       | 5.845559    | 100                  |
| ATCAT    | 10357060 | 3.1892025       | 4.226954    | 95-99                |
| GCATG    | 10747795 | 3.188428        | 4.5264144   | 1                    |
| TAGTC    | 10591275 | 3.1798058       | 4.709892    | 1                    |
| TGCGC    | 10401960 | 3.1769712       | 3.5765839   | 3                    |
| GCACA    | 10521125 | 3.1631348       | 4.8926973   | 1                    |
| TAGAT    | 10840405 | 3.1612363       | 4.0194335   | 1                    |
| GACTA    | 10690305 | 3.1593647       | 5.1225075   | 100                  |
| ATAGC    | 10687975 | 3.1586764       | 4.7818837   | 1                    |
| CAGTG    | 10594325 | 3.1428998       | 4.5447874   | 4                    |
| ATGAG    | 10905615 | 3.1424367       | 4.165508    | 1                    |
| CCACT    | 10320550 | 3.1401718       | 4.9040885   | 1                    |
| CGTGC    | 10272955 | 3.1373081       | 7.093483    | 10-14                |
| TGACA    | 10599585 | 3.1325338       | 3.877474    | 20-24                |
| TGTGA    | 10664720 | 3.1218247       | 3.5042179   | 8                    |
| ACTAG    | 10556385 | 3.1197867       | 3.54185     | 9                    |
| AGTCG    | 10484180 | 3.1102422       | 5.520649    | 100                  |
| ATGTA    | 10664925 | 3.1100636       | 4.4889374   | 100                  |
| CTGTG    | 10319510 | 3.10999         | 3.8181572   | 2                    |
| CACAG    | 10381415 | 3.1091332       | 3.606858    | 2                    |
| ACGCA    | 10355145 | 3.1014452       | 6.0210006   | 10-14                |
| CACAC    | 10071600 | 3.0938532       | 4.040316    | 9                    |
| TGTAG    | 10568645 | 3.0937011       | 3.9266407   | 95-99                |
| ATCAC    | 10192780 | 3.0895534       | 4.74466     | 1                    |
| GTCGA    | 10408785 | 3.0878577       | 3.4547741   | 9                    |
| ATATC    | 10321540 | 3.0870895       | 4.2789726   | 1                    |
| AGAGC    | 10553670 | 3.0818973       | 3.8044498   | 15-19                |
| GAGAT    | 10677365 | 3.0766667       | 3.8743027   | 15-19                |
| TATCA    | 10262775 | 3.0695136       | 4.793198    | 1                    |
| GTAGA    | 10624410 | 3.0614078       | 7.2754827   | 10-14                |
| GAGTG    | 10584765 | 3.054057        | 3.959886    | 90-94                |
| ACTAC    | 10060420 | 3.0493782       | 7.8325295   | 10-14                |
| CTGTA    | 10147005 | 3.046423        | 4.05131     | 9                    |
| CACTC    | 9742415  | 3.0402584       | 3.3661404   | 2                    |
| CGAGT    | 10284845 | 3.039537        | 3.2990103   | 2                    |
| CGAGA    | 10397590 | 3.0363185       | 4.899002    | 1                    |
| TGCGT    | 10073130 | 3.035738        | 4.24626     | 100                  |
| TGACG    | 9976075  | 3.0353603       | 3.4015862   | 80-84                |
| AGAGT    | 10532125 | 3.0348163       | 8.404591    | 100                  |
| CTCGT    | 9809020  | 3.0319273       | 5.668236    | 10-14                |
| GTCAC    | 9949735  | 3.0273457       | 3.8459954   | 9                    |
| TGTGT    | 10171050 | 3.0245965       | 4.348412    | 9                    |
| TACCG    | 9930820  | 3.021591        | 4.086463    | 9                    |
| ATCGT    | 10051875 | 3.0178623       | 4.9227016   | 10-14                |
| GTATC    | 10048965 | 3.016988        | 3.9328305   | 15-19                |
| ACTGT    | 10035395 | 3.0129142       | 4.196879    | 9                    |
| TATCG    | 10035170 | 3.012847        | 4.2315593   | 1                    |
| TACTA    | 10070055 | 3.0118725       | 7.1586947   | 100                  |
| TGCTG    | 9980170  | 3.0107367       | 4.754706    | 10-14                |
| CGGTA    | 9878125  | 3.005558        | 3.949898    | 1                    |
| AGGAC    | 10016030 | 2.9998777       | 6.668892    | 100                  |
| CAGTA    | 10149295 | 2.999625        | 5.0562572   | 10-14                |
| CACTA    | 9815415  | 2.9751692       | 7.386658    | 100                  |
| CGGCT    | 9615055  | 2.9719734       | 6.988253    | 10-14                |
| GTAGT    | 10121720 | 2.9628747       | 6.9585167   | 10-14                |
| TAGTA    | 10152790 | 2.9607167       | 7.8686004   | 10-14                |
| GAGAC    | 10110995 | 2.9526262       | 8.456499    | 100                  |
| CTCTA    | 9586030  | 2.9517825       | 9.18412     | 100                  |
| TCTAC    | 9543760  | 2.9387667       | 5.7478952   | 10-14                |
| TACTC    | 9504360  | 2.9266346       | 6.73410087  | 10-14                |
| TGTCG    | 9672110  | 2.914883        | 6.7183466   | 100                  |
| CCAGC    | 9690920  | 2.913537        | 7.2990775   | 10-14                |
| ATCTA    | 9672735  | 2.8993073       | 9.42824     | 1                    |
| TACTG    | 9532125  | 2.8961233       | 5.0363903   | 1                    |
| ATAGT    | 9820795  | 2.8639016       | 6.7077346   | 100                  |
| ACTCG    | 9406970  | 2.8622022       | 8.441355    | 100                  |
| GTCTA    | 9531360  | 2.8615885       | 8.772109    | 100                  |
| TATGT    | 9614845  | 2.8483698       | 8.122417    | 100                  |
| CGAGT    | 9554395  | 2.8343954       | 7.960323    | 100                  |
| TAGAC    | 9566330  | 2.8271904       | 7.979701    | 100                  |
| TGATG    | 9642115  | 2.8224826       | 8.820636    | 100                  |
| ACATG    | 9552800  | 2.8132317       | 7.767031    | 100                  |
| CAGAC    | 9374310  | 2.8076775       | 8.450829    | 100                  |
| CGGAG    |          |                 |             |                      |
